# Supplementary material for: Duration of the common cold and similar continuous outcomes should be analyzed on the relative scale: a case study of two zinc lozenge trials
Source: Springer Nature journal article supplement (doi:10.1186/s12874-017-0356-y), 2017-05-11
Supplement: MOESM2 [file 12281116]

Duration of the common cold and similar continuous outcomes should be analyzed on the relative scale: a case study of two zinc lozenge trials

## Additional File 2: **Data analyzed in the study**

This is additional material to a paper by Hemilä (2017).  
<https://bmcmmedresmethodol.biomedcentral.com>

version April 17, 2017

Harri Hemilä  
Department of Public Health,  
University of Helsinki,  
Helsinki, FIN-00014 Finland  
[harri.hemila@helsinki.fi](mailto:harri.hemila@helsinki.fi)  
<http://www.mv.helsinki.fi/home/hemila/>  
<http://www.mv.helsinki.fi/home/hemila/Zinc.htm>

### Page

- 2 The Mossad (1996) study imputations
- 4 The Mossad (1996) data set
- 5 The Prasad (1998) data set

The survival curve (recovery from colds curve) published by Mossad (1996) [9] was measured and transformed to participants being cured and censored in Hemilä (2011) [12]. Here the measurements were reanalyzed leading to minor changes compared with the previous analysis.

**The zinc group of Mossad (1996) trial:**

| <b>Mossad 1996</b> |                 |                    |                | <b>Based on censoring,</b>                 |             |                 |              | <b>The bold No:s</b>   |            |               |            |
|--------------------|-----------------|--------------------|----------------|--------------------------------------------|-------------|-----------------|--------------|------------------------|------------|---------------|------------|
| <b>Zn (n=49)</b>   |                 |                    |                | <b>( 1 participant censored on 2 days)</b> |             |                 |              | <b>are reported in</b> |            |               |            |
| <b>Day</b>         | <b>pixels</b>   | <b>To</b>          | <b>To</b>      | <b>rescaling on the days</b>               |             | <b>To</b>       | <b>Cured</b> | <b>Censored</b>        | <b>Day</b> |               |            |
|                    |                 |                    |                | <b>9th</b>                                 | <b>11th</b> |                 |              |                        |            | <b>person</b> | <b>per</b> |
|                    | <b>measured</b> | <b>Fig</b>         | <b>persons</b> |                                            |             | <b>integers</b> |              |                        |            |               |            |
|                    | <b>100%=</b>    | <b>scale</b>       |                |                                            |             | <b>Remain</b>   |              |                        |            |               |            |
|                    | <b>2274</b>     | <b>(0 to 100%)</b> |                |                                            |             |                 |              |                        |            |               |            |
| <b>0</b>           | 213             | 100                | <b>49</b>      |                                            |             | <b>49</b>       | 0            |                        | <b>0</b>   |               | <b>0</b>   |
| <b>1</b>           | 384             | 91.7               | 44.93          |                                            |             | 45              | 4            |                        | <b>1</b>   |               | <b>1</b>   |
| <b>2</b>           | 589             | 81.76              | 40.06          |                                            |             | 40              | 5            |                        | <b>2</b>   |               | <b>2</b>   |
| <b>3</b>           | 850             | 69.09              | 33.86          |                                            |             | <b>34</b>       | 6            |                        | <b>3</b>   |               | <b>3</b>   |
| <b>4</b>           | 1180            | 53.08              | 26.01          |                                            |             | 26              | 8            |                        | <b>4</b>   |               | <b>4</b>   |
| <b>5</b>           | 1345            | 45.08              | 22.09          |                                            |             | 22              | 4            |                        | <b>5</b>   |               | <b>5</b>   |
| <b>6</b>           | 1598            | 32.8               | 16.07          |                                            |             | <b>16</b>       | 6            |                        | <b>6</b>   |               | <b>6</b>   |
| <b>7</b>           | 1893            | 18.49              | 9.06           |                                            |             | 9               | 7            |                        | <b>7</b>   |               | <b>7</b>   |
| <b>8</b>           | 2018            | 12.42              | 6.09           |                                            |             | 6               | 3            |                        | <b>8</b>   |               | <b>8</b>   |
| <b>9</b>           | 2102            | 8.35               | 4.09           | > x3/4 >                                   | 3.07        | <b>3</b>        | 2            | 1                      | <b>9</b>   |               | <b>9</b>   |
| <b>10</b>          | 2102            | 8.35               | 4.1            |                                            | 3.07        | <b>3</b>        | 0            |                        | <b>10</b>  |               | <b>10</b>  |
| <b>11</b>          | 2168            | 5.14               | 2.5            |                                            | 1.89        | <b>1</b>        | 1            | 1                      | <b>11</b>  |               | <b>11</b>  |
| <b>12</b>          | 2168            | 5.14               | 2.5            |                                            | 1.9         | <b>1</b>        | 0            |                        | <b>12</b>  |               | <b>12</b>  |
| <b>13</b>          | 2274            | 0                  | 0.0            |                                            |             | <b>0</b>        | 1            |                        | <b>13</b>  |               | <b>13</b>  |

**n = 47 2**

**Mossad reported:**

2 Zn participants dropped out after 7 to 16 days  
 The days were not reported and 9 and 11 days  
 are inferred from the Kaplan-Meier curves

**The placebo group of Mossad (1996) trial:**

| Day | pixels measured | To Fig scale (0 to 100%) | To persons | Based on censoring, (1-2 participants censored on 3 days) rescaling on the days |       |           | To person Integers Remain | The bold No:s are reported in Mossad's figure |          | Day |
|-----|-----------------|--------------------------|------------|---------------------------------------------------------------------------------|-------|-----------|---------------------------|-----------------------------------------------|----------|-----|
|     |                 |                          |            | 7th                                                                             | 15th  | 16th      |                           | Cured per day                                 | Censored |     |
| 0   | 213             | 100                      | 50         |                                                                                 |       |           | 50                        | 0                                             | 0        | 0   |
| 1   | 213             | 100                      | 50         |                                                                                 |       |           | 50                        | 0                                             |          | 1   |
| 2   | 382             | 91.8                     | 45.90      |                                                                                 |       |           | 46                        | 4                                             |          | 2   |
| 3   | 502             | 85.98                    | 42.99      |                                                                                 |       |           | 43                        | 3                                             |          | 3   |
| 4   | 710             | 75.89                    | 37.94      |                                                                                 |       |           | 38                        | 5                                             |          | 4   |
| 5   | 792             | 71.91                    | 35.95      |                                                                                 |       |           | 36                        | 2                                             |          | 5   |
| 6   | 996             | 62.01                    | 31.00      |                                                                                 |       |           | 31                        | 5                                             |          | 6   |
| 7   | 1116            | 56.19                    | 28.09      | > x26/28 >                                                                      | 26.09 |           | 26                        | 3                                             | 2        | 7   |
| 8   | 1334            | 45.61                    | 22.8       |                                                                                 | 21.18 |           | 21                        | 5                                             |          | 8   |
| 9   | 1379            | 43.43                    | 21.7       |                                                                                 | 20.16 |           | 20                        | 1                                             |          | 9   |
| 10  | 1414            | 41.73                    | 20.9       |                                                                                 | 19.37 |           | 19                        | 1                                             |          | 10  |
| 11  | 1511            | 37.02                    | 18.5       |                                                                                 | 17.19 |           | 17                        | 2                                             |          | 11  |
| 12  | 1603            | 32.56                    | 16.3       |                                                                                 | 15.1  |           | 15                        | 2                                             |          | 12  |
| 13  | 1644            | 30.57                    | 15.3       |                                                                                 | 14.2  |           | 14                        | 1                                             |          | 13  |
| 14  | 1732            | 26.3                     | 13.1       |                                                                                 | 12.2  |           | 12                        | 2                                             |          | 14  |
| 15  | 1835            | 21.3                     | 10.7       |                                                                                 | 9.9   | > x9/10 > | 9                         | 2                                             | 1        | 15  |
| 16  | 1938            | 16.3                     | 8.2        |                                                                                 | 7.6   |           | 6                         | 2                                             | 1        | 16  |
| 17  | 2050            | 10.87                    | 5.4        |                                                                                 | 5.0   |           | 4                         | 2                                             |          | 17  |
| 18  | 2101            | 8.39                     | 4.2        |                                                                                 | 3.9   |           | 3                         | 1                                             |          | 18  |
| 19  |                 |                          |            |                                                                                 |       |           | 0                         | 1                                             | 2        | 19  |

**Mossad reported:**

4 placebo participants dropped out after 7 to 16 days

n = 44 6

The days were not reported and 7, 15 and 16 days are inferred from the Kaplan-Meier curves

2 had censored data on the 19th day and 1 was cured on the 19th day

**The Mossad (1996) data set**

Total Observations in Table: 99

| <b>Mossad\$Days</b> | <b>Mossad\$Zinc</b> |          |
|---------------------|---------------------|----------|
|                     | <b>0</b>            | <b>1</b> |
| 1                   | 0                   | 4        |
| 2                   | 4                   | 5        |
| 3                   | 3                   | 6        |
| 4                   | 5                   | 8        |
| 5                   | 2                   | 4        |
| 6                   | 5                   | 6        |
| 7                   | 5                   | 7        |
| 8                   | 5                   | 3        |
| 9                   | 1                   | 3        |
| 10                  | 1                   | 0        |
| 11                  | 2                   | 2        |
| 12                  | 2                   | 0        |
| 13                  | 1                   | 1        |
| 14                  | 2                   | 0        |
| 15                  | 3                   | 0        |
| 16                  | 3                   | 0        |
| 17                  | 2                   | 0        |
| 18                  | 1                   | 0        |
| 19                  | 3                   | 0        |
| Column Total        | 50                  | 49       |

## The Petrus (1998) data set

Total Observations in Table: 101

| Petrus\$Days | Petrus\$Zinc |    |
|--------------|--------------|----|
|              | 0            | 1  |
| 2            | 3            | 6  |
| 3            | 3            | 10 |
| 4            | 9            | 9  |
| 5            | 7            | 4  |
| 6            | 6            | 7  |
| 7            | 6            | 6  |
| 8            | 3            | 5  |
| 9            | 0            | 1  |
| 10           | 1            | 1  |
| 11           | 2            | 2  |
| 12           | 1            | 1  |
| 13           | 2            | 0  |
| 14           | 2            | 0  |
| 15           | 4            | 0  |
| Column Total | 49           | 52 |
