# Supplementary material for: Duration of the common cold and similar continuous outcomes should be analyzed on the relative scale: a case study of two zinc lozenge trials
Source: Springer Nature journal article supplement (doi:10.1186/s12874-017-0356-y), 2017-05-11
Supplement: MOESM3 [file 12281116]

Duration of the common cold and similar continuous outcomes should be analyzed on the relative scale: a case study of two zinc lozenge trials

**Additional File 3: Comparison of methods available to calculate the P-values and the 95% CIs for relative effects**

This is additional material to a paper by Hemilä (2017).

<https://bmcmmedresmethodol.biomedcentral.com>

version April 17, 2017

Harri Hemilä

Department of Public Health,

University of Helsinki,

Helsinki, FIN-00014 Finland

[harri.hemila@helsinki.fi](mailto:harri.hemila@helsinki.fi)

<http://www.mv.helsinki.fi/home/hemila/>

<http://www.mv.helsinki.fi/home/hemila/Zinc.htm>

Comparison of methods available to calculate the P-values and the 95% CIs for relative effects

| <b>Trial:</b>                                            | <b>Mossad (1996) [9]</b> |         | <b>Petrus (1998) [10]</b> |         |
|----------------------------------------------------------|--------------------------|---------|---------------------------|---------|
| <b>Trial groups:</b>                                     | Zinc                     | Placebo | Zinc                      | Placebo |
| N:                                                       | 49                       | 50      | 52                        | 49      |
| <b>Mean duration in days:</b>                            | 5.20                     | 9.20    | 5.29                      | 7.06    |
| P, variance test to compare the SDs: <sup>1</sup>        | 2*10 <sup>-5</sup>       |         | 0.004                     |         |
| P, Normality test (Shapiro-Wilk):                        | 0.06                     | 0.002   | 0.003                     | 0.0001  |
| Skewness:                                                | 0.55                     | 0.41    | 0.71                      | 0.86    |
| P(t-test, equal variance):                               | 1.0*10 <sup>-5</sup>     |         | 0.0080                    |         |
| P(t-test, unequal variance):                             | 1.3*10 <sup>-5</sup>     |         | 0.0090                    |         |
| P(Fisher-Pitman permutation test):                       | 1.0*10 <sup>-5</sup>     |         | 0.0082                    |         |
| P(logrank test):                                         | 1.0*10 <sup>-5</sup>     |         | 0.0060                    |         |
| <b>The relative scale method used in this study:</b>     |                          |         |                           |         |
| 95% CI:                                                  | -62% to -24.9%           |         | -44% to -6.7%             |         |
| <b>Log transformation</b> of cold duration:              |                          |         |                           |         |
| P, variance test to compare the SDs:                     | 0.9                      |         | 0.5                       |         |
| P, Normality test (Shapiro-Wilk):                        | 0.006                    | 0.01    | 0.03                      | 0.04    |
| Skewness:                                                | -0.74                    | -0.42   | -0.11                     | -0.02   |
| 95% CI:                                                  | -56% to -25.1%           |         | -38% to -5.2%             |         |
| P (t-test of log durations, equal variance):             | 7*10 <sup>-5</sup>       |         | 0.014                     |         |
| <b>Taylor series</b> approach for RoM [5]                |                          |         |                           |         |
| 95% CI:                                                  | -55% to -29.4%           |         | -39% to -8.2%             |         |
| P (Taylor series approach, z-test as in [5]):            | 0.04*10 <sup>-5</sup>    |         | 0.0054                    |         |
| P (Taylor series approach, t-test):                      | 0.20*10 <sup>-5</sup>    |         | 0.0064                    |         |
| <b>Fieller's</b> approach for RoM (unequal variance)[17] |                          |         |                           |         |
| 95% CI:                                                  | -55% to -29.0%           |         | -39% to -7.4%             |         |
| <b>Bootstrap</b>                                         |                          |         |                           |         |
| 95% CI(mean[Zn] – mean[Placebo=100%]):                   | -62% to -25.8%           |         | -44% to -7.6%             |         |
| 95% CI(mean[Zn] / mean[Placebo] – 100%):                 | -55% to -29.4%           |         | -39% to -8.4%             |         |

The permutation test may be considered as a gold standard since it has no assumptions about the types of distributions of the cold durations. Compared with the permutation test, the t-test of the log transformed data is conservative. Compared with the permutation test, the z-test [5] of the Taylor-series based approach is anticonservative, but the t-test less so. Although there is a significant difference in the variances between the zinc and placebo groups, the t-test on the absolute scale gives a P-value essentially identical with the permutation test and the logrank test.

The relative effect approach used in this study gives 95% CIs that are conservative compared with the 95% CIs calculated with the Taylor-series based approach [5] and the Fieller's approach [17].
