# Supplementary material for: Duration of the common cold and similar continuous outcomes should be analyzed on the relative scale: a case study of two zinc lozenge trials
Source: Springer Nature journal article supplement (doi:10.1186/s12874-017-0356-y), 2017-05-11
Supplement: MOESM4 [file 12281116]

Duration of the common cold and similar continuous outcomes should be analyzed on the relative scale: a case study of two zinc lozenge trials

## Additional File 4: **Description of the calculations**

This is additional material to a paper by Hemilä (2017).  
<https://bmcmmedresmethodol.biomedcentral.com>

version April 17, 2017

Harri Hemilä  
Department of Public Health,  
University of Helsinki,  
Helsinki, FIN-00014 Finland  
[harri.hemila@helsinki.fi](mailto:harri.hemila@helsinki.fi)  
<http://www.mv.helsinki.fi/home/hemila/>  
<http://www.mv.helsinki.fi/home/hemila/Zinc.htm>

### Page

- 2 Mossad (1996) calculations
- 6 Petrus (1998) calculations
- 10 Taylor series calculation, Mossad (1996) and Petrus (1998)
- 11 Mossad (1996) Bootstrap for Additional file 3
- 12 Petrus (1998) Bootstrap for Additional file 3
- 13 Mossad (1996) Bootstrap for 90% percentile to main text
- 14 Petrus (1998) Bootstrap for 90% percentile to main text

```

> # MOSSAD
>
> Mossad <- read.csv("~/Mossad_2017_4.csv")

> Mossad$LnDays <- log(Mossad$Days)
> Mossad$RelDays <- Mossad$Days*100/mean(Mossad$Days[Mossad$Zinc == 0]) # Placebo mean = 100%
>
> MossadZn <- subset(Mossad, Zinc == 1)
> MossadPL <- subset(Mossad, Zinc == 0)

>
> # MossadZn
> (mean(MossadZn$Days))
[1] 5.204
> (sd(MossadZn$Days))
[1] 2.828
> (mean(MossadPL$Days))
[1] 9.2
> (sd(MossadPL$Days))
[1] 5.318
>
> var.test(MossadZn$Days,MossadPL$Days)
      F test to compare two variances
data: MossadZn$Days and MossadPL$Days
F = 0.28, num df = 48, denom df = 49, p-value = 2e-05
alternative hypothesis: true ratio of variances is not equal to 1
95 percent confidence interval: 0.1601 0.5003
sample estimates: ratio of variances 0.2828

> (mean(MossadZn$Days) - mean(MossadPL$Days))
[1] -3.996
>
> MossadAbs <- lm(Mossad$Days ~ Mossad$Zinc )
> summary(MossadAbs)

Coefficients:
              Estimate Std. Error t value Pr(>|t|)
(Intercept)    9.200      0.604   15.23  <2e-16 ***
Mossad$Zinc1  -3.996      0.859   -4.65   1e-05 ***

Residual standard error: 4.27 on 97 degrees of freedom
Multiple R-squared: 0.183, Adjusted R-squared: 0.174
F-statistic: 21.7 on 1 and 97 DF, p-value: 1.03e-05

> confint(MossadAbs)
              2.5 % 97.5 %
(Intercept)  8.001 10.399
Mossad$Zinc1 -5.700 -2.292
>
> quantile(MossadZn$Days, c(.25, .50, .75, .90))
25% 50% 75% 90%
   3   5   7   9
> quantile(MossadPL$Days, c(.25, .50, .75, .90))
25% 50% 75% 90%
   5   8  14  17
>
> (mean(MossadZn$RelDays)) # Relative scale, normalized to placebo mean = 100%
[1] 56.57
> (sd(MossadZn$RelDays))
[1] 30.74
> (mean(MossadPL$RelDays))
[1] 100
> (sd(MossadPL$RelDays))
[1] 57.81
>

```

```

> RoM <- mean(MossadZn$Days)/mean(MossadPL$Days)
> RoM
[1] 0.5657
> PercentageEffect <- 100*(RoM-1)
> PercentageEffect
[1] -43.43
>
> MossadRel <- lm(Mossad$RelDays ~ Mossad$Zinc )
> summary(MossadRel)

```

Coefficients:

|               | Estimate | Std. Error | t value | Pr(> t )   |
|---------------|----------|------------|---------|------------|
| (Intercept)   | 100.00   | 6.57       | 15.23   | <2e-16 *** |
| Mossad\$Zinc1 | -43.43   | 9.33       | -4.65   | 1e-05 ***  |

Residual standard error: 46.4 on 97 degrees of freedom  
Multiple R-squared: 0.183, Adjusted R-squared: 0.174  
F-statistic: 21.7 on 1 and 97 DF, p-value: 1.03e-05

```

> confint(MossadRel)

```

|               | 2.5 %  | 97.5 % |
|---------------|--------|--------|
| (Intercept)   | 86.97  | 113.03 |
| Mossad\$Zinc1 | -61.96 | -24.91 |

```

> ##### Analyses for Additional file 3
>
> var.test(MossadZn$Days,MossadPL$Days)

```

F test to compare two variances  
data: MossadZn\$Days and MossadPL\$Days  
F = 0.28, num df = 48, denom df = 49, p-value = 2e-05  
alternative hypothesis: true ratio of variances is not equal to 1  
95 percent confidence interval: 0.1601 0.5003  
sample estimates: ratio of variances 0.2828

```

>
> shapiro.test(MossadZn$Days)

```

Shapiro-Wilk normality test  
data: MossadZn\$Days  
W = 0.96, p-value = 0.06

```

> shapiro.test(MossadPL$Days)

```

Shapiro-Wilk normality test  
data: MossadPL\$Days  
W = 0.92, p-value = 0.002

```

>
> skewness(MossadZn$Days)

```

[1] 0.555

```

> skewness(MossadPL$Days)

```

[1] 0.4152

```

>
> t.test(Mossad$Days ~ Mossad$Zinc, paired=F, var.equal = T)

```

Two Sample t-test  
data: Mossad\$Days by Mossad\$Zinc  
t = 4.654, df = 97, p-value = 1.03e-05  
alternative hypothesis: true difference in means is not equal to 0  
95 percent confidence interval: 2.29168 5.70016  
sample estimates:  
mean in group 0 mean in group 1  
9.20000 5.20408

```

> t.test(Mossad$Days ~ Mossad$Zinc, paired=F, var.equal = F)

```

Welch Two Sample t-test  
data: Mossad\$Days by Mossad\$Zinc  
t = 4.68, df = 74.99, p-value = 1.25e-05  
alternative hypothesis: true difference in means is not equal to 0

95 percent confidence interval: 2.29507 5.69677  
 sample estimates:  
 mean in group 0 mean in group 1  
 9.20000 5.20408

```
> oneway_test(Mossad$Days ~ Mossad$Zinc, distribution = "exact")
Exact Two-Sample Fisher-Pitman Permutation Test
```

```
data: Mossad$Days by Mossad$Zinc (0, 1)
Z = 4.229, p-value = 1.04e-05
alternative hypothesis: true mu is not equal to 0
```

```
> MossadSurv <- Surv(Mossad$Days, Mossad$Cured)
> survdiff(MossadSurv ~ Mossad$Zinc, rho = 0) # Logrank
```

|                | N  | Observed | Expected | (O-E)^2/E | (O-E)^2/V |
|----------------|----|----------|----------|-----------|-----------|
| Mossad\$Zinc=0 | 50 | 44       | 61.3     | 4.89      | 19.5      |
| Mossad\$Zinc=1 | 49 | 47       | 29.7     | 10.10     | 19.5      |

Chisq= 19.5 on 1 degrees of freedom, p= 9.92e-06

```
>
> var.test(MossadZn$LnDays, MossadPL$LnDays) # log transformed data
F test to compare two variances
```

```
data: MossadZn$LnDays and MossadPL$LnDays
F = 0.95, num df = 48, denom df = 49, p-value = 0.9
alternative hypothesis: true ratio of variances is not equal to 1
95 percent confidence interval: 0.5399 1.6868
sample estimates: ratio of variances 0.9535
```

```
> shapiro.test(MossadZn$LnDays)
Shapiro-Wilk normality test
```

```
data: MossadZn$LnDays
W = 0.93, p-value = 0.006
```

```
> shapiro.test(MossadPL$LnDays)
Shapiro-Wilk normality test
```

```
data: MossadPL$LnDays
W = 0.94, p-value = 0.01
```

```
> skewness(MossadZn$LnDays)
```

```
[1] -0.7419
```

```
> skewness(MossadPL$LnDays)
```

```
[1] -0.4244
```

```
>
```

```
> MossadLn <- lm(Mossad$LnDays ~ Mossad$Zinc)
```

```
> summary(MossadLn)
```

Coefficients:

|               | Estimate | Std. Error | t value | Pr(> t )    |
|---------------|----------|------------|---------|-------------|
| (Intercept)   | 2.0249   | 0.0934     | 21.67   | < 2e-16 *** |
| Mossad\$Zinc1 | -0.5525  | 0.1328     | -4.16   | 6.9e-05 *** |

Residual standard error: 0.661 on 97 degrees of freedom

Multiple R-squared: 0.151, Adjusted R-squared: 0.143

F-statistic: 17.3 on 1 and 97 DF, p-value: 6.89e-05

```
> confint(MossadLn)
```

```
2.5 % 97.5 %
```

```
(Intercept) 1.8394 2.2103
```

```
Mossad$Zinc1 -0.8161 -0.2889
```

```
> (exp(confint(MossadLn))-1) # 95% CI on the log scale, back-transforming
```

```
2.5 % 97.5 %
```

```
(Intercept) 5.2930 8.1189
```

```
Mossad$Zinc1 -0.5578 -0.2509
```

### Fieller's approach:

“This function implements the t-test for the ratio of two means and Fiellers confidence interval for the ratio of two means assuming mutually independent Gaussian errors with homogeneous variances, ...

With the argument var.equal=FALSE (default), the t-test for the ratio of two means assuming mutually independent Gaussian errors and possibly heterogeneous group variances (Tamhane and Logan, 2004) is implemented.”

<https://cran.r-project.org/web/packages/mratios/index.html> (mratio.pdf)

[17] Tamhane AC, Logan BR. Finding the maximum safe dose level for heteroscedastic data.

J Biopharm Stat 2004;14:843-56.

<http://dx.doi.org/10.1081/BIP-200035413>

<https://www.ncbi.nlm.nih.gov/pubmed/15587967>

```
> t.test.ratio(MossadZn$Days, MossadPL$Days, data=Mossad, alternative = "two.sided",  
+             rho = 1, var.equal = FALSE, conf.level = 0.95)
```

```
Ratio t-test for unequal variances      ## Fieller's approach  
data: x and y  
t = -4.7, df = 75, p-value = 1e-05  
alternative hypothesis: true ratio of means is not equal to 1  
95 percent confidence interval:  0.4518 0.7101  
sample estimates:  
mean x mean y    x/y  
5.2041 9.2000 0.5657
```

```
> ( c( 0.4517684, 0.7101461, 0.565661) -1)  # Transformation to percentage scale  
[1] -0.5482 -0.2899 -0.4343  
>
```

```
> MossadCox <- coxph(MossadSurv ~ Mossad$Zinc, method = "efron") # Cox regression  
> MossadCox  
Call:  
coxph(formula = MossadSurv ~ Mossad$Zinc, method = "efron")
```

```
      coef exp(coef) se(coef)  z      p  
Mossad$Zinc1 1.016    2.763   0.237 4.3 1.7e-05
```

Likelihood ratio test=18.9 on 1 df, p=1.36e-05

n= 99, number of events= 91

```
> exp(confint(MossadCox))
```

```
      2.5 % 97.5 %
```

```
Mossad$Zinc1 1.738 4.392
```

```

> # PETRUS
>
> Petrus <- read.csv("~/Petrus_2017_4.csv")

> Petrus$LnDays <- log(Petrus$Days)
> Petrus$RelDays <- Petrus$Days*100/mean(Petrus$Days[Petrus$Zinc == 0]) # Placebo mean = 100%
>
> PetrusZn <- subset(Petrus, Zinc == 1)
> PetrusPL <- subset(Petrus, Zinc == 0)

>
> # PetrusZn
> (mean(PetrusZn$Days))
[1] 5.28846
> (sd(PetrusZn$Days))
[1] 2.56933
> (mean(PetrusPL$Days))
[1] 7.06122
> (sd(PetrusPL$Days))
[1] 3.9073
>
> var.test(PetrusZn$Days,PetrusPL$Days)
      F test to compare two variances
data:  PetrusZn$Days and PetrusPL$Days
F = 0.4324, num df = 51, denom df = 48, p-value = 0.00365
alternative hypothesis: true ratio of variances is not equal to 1
95 percent confidence interval:  0.245433 0.758092
sample estimates: ratio of variances  0.432399

>
> (mean(PetrusZn$Days) - mean(PetrusPL$Days))
[1] -1.77276
>
> PetrusAbs <- lm(Petrus$Days ~ Petrus$Zinc )
> summary(PetrusAbs)

Coefficients:
              Estimate Std. Error t value Pr(>|t|)
(Intercept)    7.061      0.470   15.04 <2e-16 ***
Petrus$Zinc1  -1.773      0.654   -2.71  0.008 **

Residual standard error: 3.29 on 99 degrees of freedom
Multiple R-squared:  0.069,    Adjusted R-squared:  0.0596
F-statistic: 7.34 on 1 and 99 DF,  p-value: 0.00795

> confint(PetrusAbs)
              2.5 %    97.5 %
(Intercept)  6.12956  7.992894
Petrus$Zinc1 -3.07120 -0.474326
>
> quantile(PetrusZn$Days, c(.25, .50, .75, .90))
25% 50% 75% 90%
  3  5  7  8
> quantile(PetrusPL$Days, c(.25, .50, .75, .90))
25% 50% 75% 90%
  4  6  8 14
>
> (mean(PetrusZn$RelDays))
[1] 74.8944
> (sd(PetrusZn$RelDays))
[1] 36.3864
> (mean(PetrusPL$RelDays))
[1] 100
> (sd(PetrusPL$RelDays))
[1] 55.3346
>
> RoM <-mean(PetrusZn$Days)/mean(PetrusPL$Days)
> RoM
[1] 0.748944
> PercentageEffect <- 100*(RoM-1)
> PercentageEffect
[1] -25.1056
>

```

```

> PetrusRel <- lm(Petrus$RelDays ~ Petrus$Zinc )
> summary(PetrusRel)

Coefficients:
              Estimate Std. Error t value Pr(>|t|)
(Intercept)    100.00      6.65    15.04 <2e-16 ***
Petrus$Zinc1   -25.11      9.27    -2.71  0.008 **

Residual standard error: 46.5 on 99 degrees of freedom
Multiple R-squared:  0.069,    Adjusted R-squared:  0.0596
F-statistic: 7.34 on 1 and 99 DF,  p-value: 0.00795

> confint(PetrusRel)
              2.5 %    97.5 %
(Intercept)  86.8058 113.19416
Petrus$Zinc1 -43.4939 -6.71734
>
> ##### Analyses for Additional file 3
>
> var.test(PetrusZn$Days,PetrusPL$Days)

      F test to compare two variances

data:  PetrusZn$Days and PetrusPL$Days
F = 0.4324, num df = 51, denom df = 48, p-value = 0.00365
alternative hypothesis: true ratio of variances is not equal to 1
95 percent confidence interval:
 0.245433 0.758092
sample estimates:
ratio of variances
 0.432399

> shapiro.test(PetrusZn$Days)
      Shapiro-Wilk normality test

data:  PetrusZn$Days
W = 0.9234, p-value = 0.00251

> shapiro.test(PetrusPL$Days)
      Shapiro-Wilk normality test

data:  PetrusPL$Days
W = 0.8719, p-value = 7.51e-05

>
> skewness(PetrusZn$Days)
[1] 0.712531
> skewness(PetrusPL$Days)
[1] 0.861827
>
> t.test(Petrus$Days ~ Petrus$Zinc, paired=F, var.equal = T)
      Two Sample t-test

data:  Petrus$Days by Petrus$Zinc
t = 2.709, df = 99, p-value = 0.00795
alternative hypothesis: true difference in means is not equal to 0
95 percent confidence interval:  0.474326 3.071200
sample estimates:
mean in group 0 mean in group 1
 7.06122      5.28846

> t.test(Petrus$Days ~ Petrus$Zinc, paired=F, var.equal = F)
      Welch Two Sample t-test

data:  Petrus$Days by Petrus$Zinc
t = 2.677, df = 82.23, p-value = 0.00896
alternative hypothesis: true difference in means is not equal to 0
95 percent confidence interval:  0.455472 3.090053
sample estimates:
mean in group 0 mean in group 1
 7.06122      5.28846

>
> oneway_test(Petrus$Days ~ Petrus$Zinc, distribution = "exact")
      Exact Two-Sample Fisher-Pitman Permutation Test

data:  Petrus$Days by Petrus$Zinc (0, 1)
Z = 2.627, p-value = 0.00815
alternative hypothesis: true mu is not equal to 0

```

```

> PetrusSurv <- Surv(Petrus$Days, Petrus$Cured)
> survdiff(PetrusSurv ~ Petrus$Zinc, rho = 0) # logrank
Call:
survdiff(formula = PetrusSurv ~ Petrus$Zinc, rho = 0)

      N Observed Expected (O-E)^2/E (O-E)^2/V
Petrus$Zinc=0 49      49      60.6      2.21      7.56
Petrus$Zinc=1 52      52      40.4      3.31      7.56

Chisq= 7.6 on 1 degrees of freedom, p= 0.00597
>
> var.test(PetrusZn$LnDays,PetrusPL$LnDays) # log transformed data
      F test to compare two variances
data: PetrusZn$LnDays and PetrusPL$LnDays
F = 0.8206, num df = 51, denom df = 48, p-value = 0.487
alternative hypothesis: true ratio of variances is not equal to 1
95 percent confidence interval: 0.465804 1.438773
sample estimates: ratio of variances 0.820644

>
> shapiro.test(PetrusZn$LnDays)
      Shapiro-Wilk normality test
data: PetrusZn$LnDays
W = 0.9497, p-value = 0.0284

> shapiro.test(PetrusPL$LnDays)
      Shapiro-Wilk normality test
data: PetrusPL$LnDays
W = 0.9516, p-value = 0.0428

>
> skewness(PetrusZn$LnDays)
[1] -0.107644
> skewness(PetrusPL$LnDays)
[1] -0.0151264
>
> PetrusLn <- lm(Petrus$LnDays ~ Petrus$Zinc )
> summary(PetrusLn)

Coefficients:
              Estimate Std. Error t value Pr(>|t|)
(Intercept)  1.8083     0.0751   24.08 <2e-16 ***
Petrus$Zinc1 -0.2611     0.1047   -2.49  0.014 *
---
Residual standard error: 0.526 on 99 degrees of freedom
Multiple R-squared: 0.0591, Adjusted R-squared: 0.0496
F-statistic: 6.22 on 1 and 99 DF, p-value: 0.0143

> confint(PetrusLn)
              2.5 %      97.5 %
(Intercept)  1.659256  1.9573086
Petrus$Zinc1 -0.468766 -0.0533796
> (exp(confint(PetrusLn))-1) # 95% CI on the log scale, back-transforming
              2.5 %      97.5 %
(Intercept)  4.255399  6.0802457
Petrus$Zinc1 -0.374226 -0.0519799

```



```

> t.test.ratio(PetrusZn$Days, PetrusPL$Days, data=Petrus, alternative = "two.sided",
+             rho = 1, var.equal = FALSE, conf.level = 0.95)

      Ratio t-test for unequal variances      ## Fieller's approach

data: x and y
t = -2.677, df = 82.23, p-value = 0.00896
alternative hypothesis: true ratio of means is not equal to 1
95 percent confidence interval:  0.610357 0.925347
sample estimates:
  mean x   mean y     x/y
5.288462 7.061224 0.748944

> ( c( 0.6103566, 0.9253466, 0.748944) -1) # Transformation to percentage scale
[1] -0.3896434 -0.0746534 -0.2510560
>

```

```

> PetrusCox <- coxph(PetrusSurv ~ Petrus$Zinc, method = "efron") # Cox regression
> PetrusCox
Call:
coxph(formula = PetrusSurv ~ Petrus$Zinc, method = "efron")

```

|               | coef  | exp(coef) | se(coef) | z    | p      |
|---------------|-------|-----------|----------|------|--------|
| Petrus\$Zinc1 | 0.573 | 1.774     | 0.214    | 2.68 | 0.0073 |

Likelihood ratio test=7.3 on 1 df, p=0.00691

n= 101, number of events= 101

```
> exp(confint(PetrusCox))
```

|               | 2.5 %   | 97.5 %  |
|---------------|---------|---------|
| Petrus\$Zinc1 | 1.16717 | 2.69598 |

```

> # Taylor series calculations for 95% CI
> # Mossad
>
> (N1M =length(MossadZn$Days))
[1] 49
> (M1M =mean(MossadZn$Days))
[1] 5.20408
> (SD1M =sd(MossadZn$Days))
[1] 2.82828
>
> (N2M = length(MossadPL$Days))
[1] 50
> (M2M = mean(MossadPL$Days))
[1] 9.2
> (SD2M =sd(MossadPL$Days))
[1] 5.31843
>
> MZN <- (SD1M/M1M)**2/N1M # [SD(Zn)/Mean(Zn)]**2 /N(Zn)
> MPL <- (SD2M/M2M)**2/N2M # [SD(Pl)/Mean(Pl)]**2 /N(Pl)
> (Mln_SEpool <- sqrt(MZN + MPL))
[1] 0.112746
> Mln_RoM <- log(M1M/M2M)
> (Mln_LowCI <- Mln_RoM - 1.96*Mln_SEpool)
[1] -0.790742
> (Mln_HiCI <- Mln_RoM + 1.96*Mln_SEpool)
[1] -0.348779
> (MLowCI_rel <- exp(Mln_LowCI))
[1] 0.453508
> (MHiCI_rel <- exp(Mln_HiCI))
[1] 0.705549
> (MLowCI <- (MLowCI_rel-1)*100) # to the percentage effect scale
[1] -54.6492
> (MHiCI <- (MHiCI_rel-1)*100) # to the percentage effect scale
[1] -29.4451
> (M_Z = Mln_RoM/Mln_SEpool)
[1] -5.0535
> (2*pnorm(M_Z)) # z-test as in [5]
[1] 4.33784e-07
> (2*pt(M_Z,N1M+N2M-2)) # t-test
[1] 2.04158e-06
>
> # Petrus
>
> (N1P =length(PetrusZn$Days))
[1] 52
> (M1P =mean(PetrusZn$Days))
[1] 5.28846
> (SD1P =sd(PetrusZn$Days))
[1] 2.56933
>
> (N2P = length(PetrusPL$Days))
[1] 49
> (M2P = mean(PetrusPL$Days))
[1] 7.06122
> (SD2P =sd(PetrusPL$Days))
[1] 3.9073
>
> PZN <- (SD1P/M1P)**2/N1P # [SD(Zn)/Mean(Zn)]**2 /N(Zn)
> PPL <- (SD2P/M2P)**2/N2P # [SD(Pl)/Mean(Pl)]**2 /N(Pl)
> (Pln_SEpool <- sqrt(PZN + PPL))
[1] 0.103865
> Pln_RoM <- log(M1P/M2P)
> (Pln_LowCI <- Pln_RoM - 1.96*Pln_SEpool)
[1] -0.492667
> (Pln_HiCI <- Pln_RoM + 1.96*Pln_SEpool)
[1] -0.0855153
> (PLowCI_rel <- exp(Pln_LowCI))
[1] 0.610995
> (PHiCI_rel <- exp(Pln_HiCI))
[1] 0.918039
> (PLowCI <- (PLowCI_rel-1)*100) # to percentage scale
[1] -38.9005
> (PHiCI <- (PHiCI_rel-1)*100) # to percentage scale
[1] -8.19609
> (P_Z = Pln_RoM/Pln_SEpool)
[1] -2.78333
> (2*pnorm(P_Z)) # z-test
[1] 0.00538042
> (2*pt(P_Z,N1P+N2P-2)) # t-test
[1] 0.0064452

```

```

# BOOTSTRAP
# Ratio of means
RatioM <- function(Mossad, d){
  EMR=Mossad[d.]
  return(100*(mean(EMR$RelDays[EMR$Zinc == 1])/mean(EMR$RelDays[EMR$Zinc == 0]) -1))
}

bM<-boot(Mossad, RatioM, strata = Mossad$Zinc, R = 100000)
(ci = boot.ci(bM, type =c("basic", "bca")))

#
BOOTSTRAP CONFIDENCE INTERVAL CALCULATIONS
Based on 100000 bootstrap replicates

CALL :
  boot.ci(boot.out = bM, type = c("basic", "bca"))

Intervals :
  Level   Basic          BCa
95% (-57.38, -32.38 ) (-54.45, -29.40 )
Calculations and Intervals on Original Scale

###
# Difference in means
DiffM <- function(Mossad, d){
  EMD=Mossad[d.]
  return(mean(EMD$RelDays[EMD$Zinc == 1]) -mean(EMD$RelDays[EMD$Zinc == 0]))
}

bMD<-boot(Mossad, DiffM, R = 100000)
(ci = boot.ci(bMD, type =c("basic", "bca")))

#
BOOTSTRAP CONFIDENCE INTERVAL CALCULATIONS
Based on 100000 bootstrap replicates

CALL :
  boot.ci(boot.out = bMD, type = c("basic", "bca"))

Intervals :
  Level   Basic          BCa
95% (-61.40, -25.13 ) (-62.06, -25.80 )
Calculations and Intervals on Original Scale

```

```
RatioP <- function(Petrus, d){
  EPR=Petrus[d,]
  return(100*(mean(EPR$RelDays[EPR$Zinc == 1])/mean(EPR$RelDays[EPR$Zinc == 0]) -1))
}
```

```
bPR<-boot(Petrus, RatioP, strata = Petrus$Zinc, R = 100000)
(ci = boot.ci(bPR, type =c("basic", "bca")))
```

```
#
BOOTSTRAP CONFIDENCE INTERVAL CALCULATIONS
Based on 100000 bootstrap replicates
```

```
CALL :
boot.ci(boot.out = bPR, type = c("basic", "bca"))
```

```
Intervals :
Level Basic BCa
95% (-42.05, -11.58 ) (-38.85, -8.45 )
Calculations and Intervals on Original Scale
```

```
###
# Difference in means
```

```
DiffP <- function(Petrus, d){
  EPD=Petrus[d,]
  return(mean(EPD$RelDays[EPD$Zinc == 1]) - mean(EPD$RelDays[EPD$Zinc == 0]))
}
```

```
bPD<-boot(Petrus, DiffP, R = 100000)
(ci = boot.ci(bPD, type =c("basic", "bca")))
```

```
#
BOOTSTRAP CONFIDENCE INTERVAL CALCULATIONS
Based on 100000 bootstrap replicates
```

```
CALL :
boot.ci(boot.out = bPD, type = c("basic", "bca"))
```

```
Intervals :
Level Basic BCa
95% (-43.16, -6.57 ) (-44.20, -7.59 )
Calculations and Intervals on Original Scale
```

```

# 90-percentile bootstraps

Quant90DiffM <- function(Mossad, d){
  EPD=Mossad[d,]
  return(quantile(EPD$Days[EPD$Zinc == 1], .9) - quantile(EPD$Days[EPD$Zinc == 0],0.9))
}

bMq90<-boot(Mossad, Quant90DiffM, R = 50000)
(ci = boot.ci(bMq90, type =c("basic","bca")))

#
BOOTSTRAP CONFIDENCE INTERVAL CALCULATIONS
Based on 50000 bootstrap replicates

CALL :
  boot.ci(boot.out = bMq90, type = c("basic", "bca"))

Intervals :
  Level   Basic          BCa
95%  (-11.0, -5.0)  (-11.0, -5.6)
Calculations and Intervals on Original Scale

##

Quant90RatioM <- function(Mossad, d){
  EPD=Mossad[d,]
  return(quantile(EPD$Days[EPD$Zinc == 1], .9)/quantile(EPD$Days[EPD$Zinc == 0],0.9) -1)
}

bMq90<-boot(Mossad, Quant90RatioM, R = 50000)
(ci = boot.ci(bMq90, type =c("basic","bca")))

#
BOOTSTRAP CONFIDENCE INTERVAL CALCULATIONS
Based on 50000 bootstrap replicates

CALL :
  boot.ci(boot.out = bMq90, type = c("basic", "bca"))

Intervals :
  Level   Basic          BCa
95%  (-0.6250, -0.3529)  (-0.5789, -0.3125)
Calculations and Intervals on Original Scale

```

```
Quant90DiffP <- function(Petrus, d){
  EPD=Petrus[d,]
  return(quantile(EPD$Days[EPD$Zinc == 1], .9) - quantile(EPD$Days[EPD$Zinc == 0],0.9))
}
```

```
bPq90<-boot(Petrus, Quant90DiffP, R = 50000)
(ci = boot.ci(bPq90, type =c("basic","bca")))
```

```
#
BOOTSTRAP CONFIDENCE INTERVAL CALCULATIONS
Based on 50000 bootstrap replicates
```

```
CALL :
boot.ci(boot.out = bPq90, type = c("basic", "bca"))
```

```
Intervals :
Level Basic BCa
95% (-10.7, -5.0) (-8.0, -4.5)
Calculations and Intervals on Original Scale
Some BCa intervals may be unstable
```

```
###
```

```
Quant90RatioP <- function(Petrus, d){
  EPD=Petrus[d,]
  return(quantile(EPD$Days[EPD$Zinc == 1], .9)/quantile(EPD$Days[EPD$Zinc == 0],0.9) -1)
}
```

```
bPq90<-boot(Petrus, Quant90RatioP, R = 50000)
(ci = boot.ci(bPq90, type =c("basic","bca")))
```

```
#
BOOTSTRAP CONFIDENCE INTERVAL CALCULATIONS
Based on 50000 bootstrap replicates
```

```
CALL :
boot.ci(boot.out = bPq90, type = c("basic", "bca"))
```

```
Intervals :
Level Basic BCa
95% (-0.7441, -0.3638 ) (-0.5340, -0.3333 )
Calculations and Intervals on Original Scale
```
